# Supplementary material for: Preparation of Ru-doped TiO2 nanotube arrays through anodizing TiRu alloys for bifunctional HER/OER electrocatalysts
Source: Royal Society of Chemistry journal article supplement (doi:10.1039/d3nr03831a), 2023-01-01
Supplement: d3nr03831a1.pdf [file d3nr03831a1.pdf]

## Supporting Information

### **Preparation of Ru-doped TiO<sub>2</sub> nanotube arrays through anodizing TiRu alloys for bifunctional HER/OER electrocatalysts**

Yuejiao Liu, Xixin Wang, Mengyao Yang, Ying Li, Yue Xiao, Jianling Zhao\*

School of Materials Science and Engineering, Hebei University of Technology,

Tianjin 300130, China

Corresponding authors: Jianling Zhao ([hebutzhaoj@126.com](mailto:hebutzhaoj@126.com)).

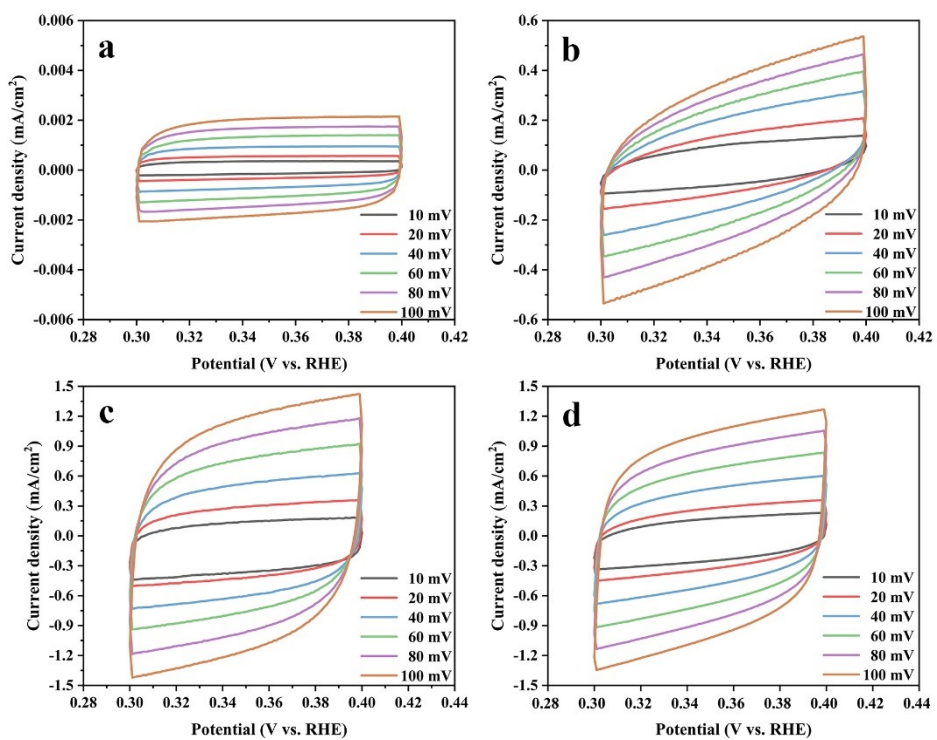

Fig. S1 CV Curves of TNTA and xRu-TNTA at different sweep speeds (a-d)

Table S1 Comparison of the HER performance for a-Ru-TNTA with other reported electrodes

| Electrode                                            | Electrolyte | $\eta_{10}$<br>(mV) | Tafel slope<br>(mV/dec) | $C_{dl}$<br>(mF/cm <sup>2</sup> ) | Ref. |
|------------------------------------------------------|-------------|---------------------|-------------------------|-----------------------------------|------|
| a-Ru-TNTA(RT)                                        | 1 M KOH     | 41                  | 67                      | 7.7                               | This |
| a-Ru-TNTA(80 °C)                                     | 1 M KOH     | 19                  | 64                      | -                                 | work |
| TiO <sub>2</sub> @Co <sub>9</sub> S <sub>8</sub> /NF | 1 M KOH     | 139                 | 65                      | -                                 | 1    |
| H-TiO <sub>2</sub> /CFP-GC                           | 1 M KOH     | 128                 | 79                      | -                                 | 2    |
| Ru/C-TiO <sub>2</sub> /RDE                           | 1 M KOH     | 44                  | 73.7                    | -                                 | 3    |
| Ni/TiO <sub>2</sub> NPAs/CC                          | 1 M KOH     | 88                  | 78                      | 8                                 | 4    |
| MoS <sub>2</sub> /TiO <sub>2</sub> -NTs/GCE          | 1 M KOH     | 127                 | 59                      | 6.9                               | 5    |
| Ni/TiO <sub>2</sub>                                  | 1 M KOH     | 46                  | 41.8                    | 31.1                              | 6    |
| Co-TiO <sub>2</sub> @Ti(H <sub>2</sub> )             | 1 M KOH     | 78                  | 67.8                    | 4.1                               | 7    |
| Ru@RuO <sub>2</sub> /GCE                             | 0.1 M KOH   | 137                 | 112                     | -                                 | 8    |
| NP-RuO <sub>2</sub> -450/Ti                          | 1 M KOH     | 87                  | 45.8                    | 5.18                              | 9    |
| Ru-CoNi@NC                                           | 1 M KOH     | 268                 | 63                      | -                                 | 10   |
| CF@Ru-CoCH NWs                                       | 1 M KOH     | 66                  | 65                      | 29.2                              | 11   |
| Co/Mo <sub>2</sub> C/CC                              | 1 M KOH     | 157                 | 109.2                   | -                                 | 12   |
| P-Co <sub>3</sub> Mo <sub>3</sub> C/Co/CNFs          | 1 M KOH     | 81                  | 64                      | -                                 | 13   |
| VN-Co-P/CC                                           | 1 M KOH     | 137                 | 81                      | -                                 | 14   |
| Cu/CuO@Co/Co <sub>3</sub> O <sub>4</sub>             | 1 M KOH     | 82                  | 48                      | -                                 | 15   |
| CeO <sub>2</sub> /Ni-Cu                              | 1 M KOH     | 72                  | 105.4                   | 36                                | 16   |
| Ni-Cu                                                | 1 M KOH     | 76                  | 46                      | -                                 | 17   |
| Ni-Se-Cu/NF                                          | 1 M KOH     | 136                 | 117.5                   | 2.58                              | 18   |
| Ni-Cu-P@Ni-Cu/NF                                     | 1 M KOH     | 70                  | 76                      | -                                 | 19   |
| Co-P/Co-N-C/NPC/NF                                   | 1 M KOH     | 234                 | 139                     | -                                 | 20   |
| Co/Co <sub>3</sub> O <sub>4</sub> /NF                | 1 M KOH     | 90                  | 44                      | -                                 | 21   |
| Co <sub>3</sub> O <sub>4</sub> -NiO/SS               | 1 M KOH     | 378                 | 90                      | -                                 | 22   |
| NiCoP/SCW                                            | 1 M KOH     | 178                 | 64.4                    | -                                 | 23   |
| Fe-Co <sub>3</sub> O <sub>4</sub> /CNTs/GCE          | 1 M KOH     | 120                 | 54                      | -                                 | 24   |
| FePx@Fe                                              | 1 M KOH     | 124                 | 78                      | -                                 | 25   |
| Ni-Mo-Fe/Cu                                          | 1 M KOH     | 65                  | 63                      | -                                 | 26   |

Table S2 Comparison of the OER performance for c-Ru-TNTA with other reported electrodes

| Electrode                                                                              | Electrolyte                          | $\eta_{10}$<br>(mV) | Tafel slope<br>(mV/dec) | Ref. |
|----------------------------------------------------------------------------------------|--------------------------------------|---------------------|-------------------------|------|
| c-Ru-TNTA(RT)                                                                          | 1 M KOH                              | 349                 | 89                      | This |
| c-Ru-TNTA(80 °C)                                                                       | 1 M KOH                              | 227                 | 82                      | work |
| CoO <sub>x</sub> -black TNTA                                                           | 1 M KOH                              | 352                 | 65                      | 27   |
| Ag <sub>3</sub> PO <sub>4</sub> -Bi <sub>2</sub> WO <sub>6</sub> -TiO <sub>2</sub> /NF | 1 M KOH                              | 356                 | 64                      | 28   |
| TiO <sub>2</sub> /SnS <sub>2</sub> /NF                                                 | 1 M NaOH                             | 570                 | 107                     | 29   |
| Cu-(a-NiSe <sub>x</sub> /c-NiSe <sub>2</sub> )/TiO <sub>2</sub> NRs/CC                 | 1 M KOH                              | 339                 | 54.2                    | 30   |
| Co-TiO <sub>2</sub> /GCE                                                               | 1 M KOH                              | 390                 | 65                      | 31   |
| Co-ZIF <sub>1.5</sub> /10CNF <sub>2</sub> /GC                                          | 0.1 M KOH                            | 390                 | 122                     | 32   |
| MnO <sub>2</sub> /CNTs/RDE                                                             | 0.1 M KOH                            | 421                 | 67                      | 33   |
| Pt <sub>70</sub> Ru <sub>25</sub> Ir <sub>5</sub> /GC                                  | 0.5 M H <sub>2</sub> SO <sub>4</sub> | 470                 | 118                     | 34   |
| Ru@RuO <sub>2</sub> /GC                                                                | 0.1 M KOH                            | 320                 | 86                      | 8    |
| CoNG/Ru/GCE                                                                            | 1 M KOH                              | 350                 | 82.3                    | 35   |
| $\alpha$ -MnO <sub>2</sub> /GCE                                                        | 1 M KOH                              | 450                 | 73.1                    | 36   |
| Co <sub>3</sub> O <sub>4</sub> -MnO <sub>2</sub> -CNT/GCE                              | 0.1 M KOH                            | 420                 | 68                      | 37   |
| Co-P/Co-N-C/NPC/NF                                                                     | 1 M KOH                              | 374                 | 92                      | 20   |
| H-TiO <sub>2</sub> /MnO <sub>x</sub> NWs/CC                                            | 0.1 M KOH                            | 388                 | -                       | 38   |
| NS-MnO <sub>2</sub> /NF                                                                | 1 M KOH                              | 320                 | 40                      | 39   |
| CoNCNTF/CNFs/RDE                                                                       | 0.1 M KOH                            | 380                 | 66.8                    | 40   |
| CoNi/BCF/RDE                                                                           | 0.1 M KOH                            | 370                 | 166                     | 41   |
| NiO/NiCo <sub>2</sub> O <sub>4</sub> /GC                                               | 1 M KOH                              | 357                 | 130                     | 42   |
| Amorphous cobalt phyllosilicate/CP                                                     | 1 M KOH                              | 364                 | 60                      | 43   |

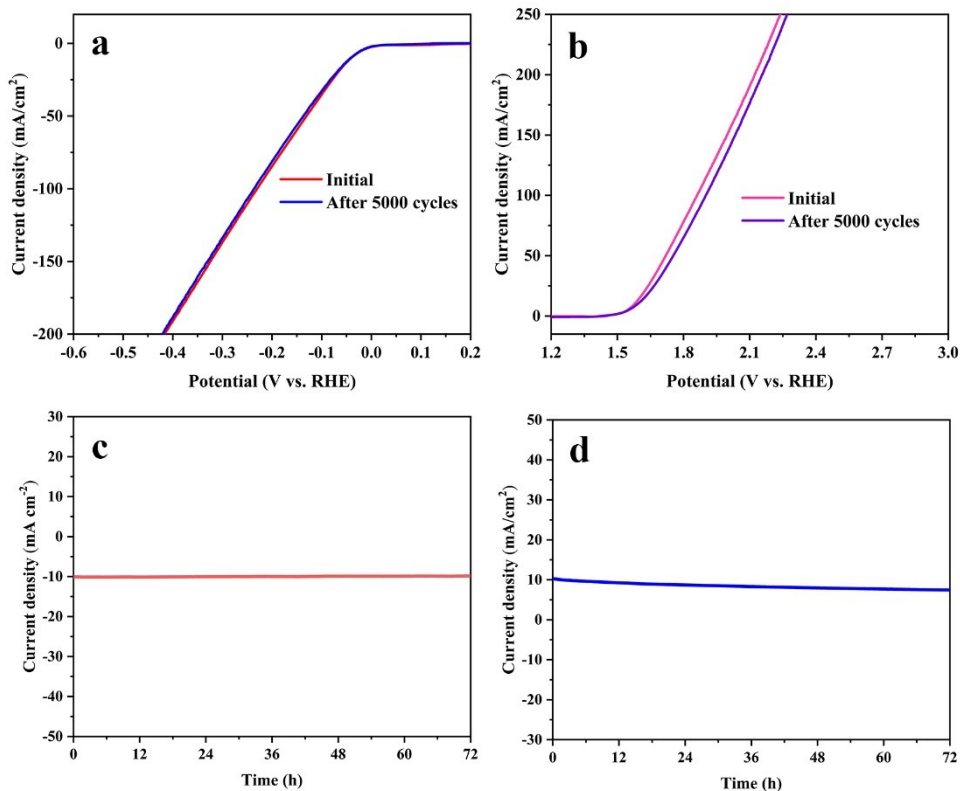

Fig. S2 Polarization curves (a, b) after 5000 CV cycles and current density vs. electrolysis time curves (c, d) of a-Ru-TNTA and c-Ru-TNTA

Table S3 Comparison of the overall water voltage (V, 10 mA/cm<sup>2</sup>) for different electrode groups with other recently reported

| Two-electrode electrolyzer                                                                                           | Electrolyte | Cell voltage | Ref.      |
|----------------------------------------------------------------------------------------------------------------------|-------------|--------------|-----------|
| a-Ru-TNTA  c-Ru-TNTA                                                                                                 | 1 M KOH     | 1.496        | This work |
| Ni(Cu)@NiFeP/NM  Ni(Cu)@NiFeP/NM                                                                                     | 1 M KOH     | 1.601        | 44        |
| CoP/TiM  CoP/TiM                                                                                                     | 1 M KOH     | 1.65         | 45        |
| Ni-Zn/rGO/NF  Ni-Zn/rGo/NF                                                                                           | 1 M KOH     | 1.687        | 46        |
| Co <sub>0.8</sub> Ru <sub>0.2</sub> O <sub>x</sub> @NC/CP  Co <sub>0.8</sub> Ru <sub>0.2</sub> O <sub>x</sub> @NC/CP | 1 M KOH     | 1.55         | 47        |
| Co/Mo <sub>2</sub> C/CC  Co/Mo <sub>2</sub> C/CC                                                                     | 1 M KOH     | 1.68         | 12        |
| CuCl/CuO(Mn)-NF  CuCl/CuO(Mn)-NF                                                                                     | 1 M KOH     | 1.66         | 48        |
| FePx@Fe  FePx@Fe                                                                                                     | 1 M KOH     | 1.67         | 25        |
| Mn-Ni <sub>2</sub> P-0.053  Mn-Ni <sub>2</sub> P-0.053                                                               | 1 M KOH     | 1.58         | 49        |
| NiCoP/SCW  NiCoP/SCW                                                                                                 | 1 M KOH     | 1.59         | 23        |

## References

1. S. Deng, Y. Zhong, Y. Zeng, Y. Wang, X. Wang, X. Lu, X. Xia and J. Tu, *Adv. Sci.*, 2018, **5**, 1700772.
2. R. Vadakkekara and S. R. Jadkar, *ACS Appl. Energ. Mater.*, 2021, **5**, 674-684.
3. Y. Wang, Q. Zhu, T. Xie, Y. Peng, S. Liu and J. Wang, *ChemElectroChem*, 2020, **7**, 1182-1186.
4. Y. Li, K.-A. Min, B. Han and L. Y. S. Lee, *Appl. Catal. B-Environ.*, 2021, **282**, 119548.
5. N. Komba, G. Zhang, Z. Pu, M. Wu, F. Rosei and S. Sun, *Int. J. Hydrog. Energy*, 2020, **45**, 4468-4480.
6. P. Zhou, S. Wang, G. Zhai, X. Lv, Y. Liu, Z. Wang, P. Wang, Z. Zheng, H. Cheng, Y. Dai and B. Huang, *J. Mater. Chem. A*, 2021, **9**, 6325-6334.
7. R. Li, B. Hu, T. Yu, Z. Shao, Y. Wang and S. Song, *Small Methods*, 2021, **5**, 2100246.
8. R. Jiang, D. T. Tran, J. Li and D. Chu, *Energy Environ. Mater.*, 2019, **2**, 201-208.
9. N. Cong, Y. Han, L. Tan, C. Zhai, H. Chen, J. Han, H. Fang, X. Zhou, Y. Zhu and Z. Ren, *J. Electroanal. Chem.*, 2021, **881**, 114955.
10. W. Wang, S. Xi, Y. Shao, W. Sun, S. Wang, J. Gao, C. Mao, X. Guo and G. Li, *ACS Sustain. Chem. Eng.*, 2019, **7**, 17227-17236.
11. J. Li, Q. Zhou, Z. Shen, S. Li, J. Pu, C. Zhong, M. Cao, X. Jin, H. Zhang, Y. Wang and H. Ma, *Electrochim. Acta*, 2020, **331**, 135367.
12. S. Cui, M. Li and X. Bo, *Int. J. Hydrog. Energy*, 2020, **45**, 21221-21231.
13. L. Qiu, L. Jiang, Z. Ye, Y. Liu, T. Cen, X. Peng and D. Yuan, *Electrochim. Acta*, 2019, **325**, 134962.
14. H. Yang, Y. Hu, D. Huang, T. Xiong, M. Li, M. S. Balogun and Y. Tong, *Mater. Today Chem.*, 2019, **11**, 1-7.
15. Z. Cai, A. Li, W. Zhang, Y. Zhang, L. Cui and J. Liu, *J. Alloys Compd.*, 2021, **882**, 160749.
16. S. Li, Z. Xu, L. Zhou, D. Li, B. Nan, X. Dou, J. Zhang, J. Zeng and L. Yu, *J. Electroanal. Chem.*, 2021, **898**, 115640.
17. J. Niu, Y. Yue, C. Yang, Y. Wang, J. Qin, X. Zhang and Z.-S. Wu, *Appl. Surf. Sci.*, 2021, **561**, 150030.
18. Y. Gao, Y. Wu, H. He and W. Tan, *J. Colloid Interface Sci.*, 2020, **578**, 555-564.
19. G. B. Darband, N. Lotfi, A. Aliabadi, S. Hyun and S. Shanmugam, *Electrochim. Acta*, 2021, **382**, 138335.
20. S. Wang, H. Jang, J. Wang, Z. Wu, X. Liu and J. Cho, *ChemSusChem*, 2019, **12**, 830-838.
21. X. Yan, L. Tian, M. He and X. Chen, *Nano Lett.*, 2015, **15**, 6015-6021.
22. G. M. Kumar, P. Ilanchezhian, C. Siva, A. Madhankumar, T. Kang and D. Kim, *Int. J. Hydrog. Energy*, 2020, **45**, 391-400.
23. V. R. Jothi, R. Bose, H. Rajan, C. Jung and S. C. Yi, *Adv. Energy Mater.*, 2018, **8**, 1802615.
24. H. Begum and S. Jeon, *Int. J. Hydrog. Energy*, 2018, **43**, 5522-5529.
25. Y. Wang, B. Ma and Y. Chen, *J. Mater. Sci.*, 2019, **54**, 14872-14883.

26. R. Badrnezhad, F. Nasri, H. Pourfarzad and S. K. Jafari, *Int. J. Hydrog. Energy*, 2021, **46**, 3821-3832.
27. Y. Yang, L. C. Kao, Y. Liu, K. Sun, H. Yu, J. Guo, S. Y. H. Liou and M. R. Hoffmann, *ACS Catal.*, 2018, **8**, 4278-4287.
28. K. K. Mandari, N. Son and M. Kang, *Appl. Surf. Sci.*, 2021, **566**, 150681.
29. M. Li, H. Liu, T. Lv and M. Ding, *J. Mater. Chem. A*, 2018, **6**, 3488-3499.
30. K. R. Park, D. T. Tran, T. T. Nguyen, N. H. Kim and J. H. Lee, *Chem. Eng. J.*, 2021, **422**, 130048.
31. Y. Yan, C. Liu, H. Jian, X. Cheng, T. Hu, D. Wang, L. Shang, G. Chen, P. Schaaf, X. Wang, E. Kan and T. Zhang, *Adv. Funct. Mater.*, 2020, **31**, 2009610.
32. H. He, Y. Lei, S. Liu, K. Thummavichai, Y. Zhu and N. Wang, *J. Colloid Interface Sci.*, 2022, **630**, 140-149.
33. N. Xu, Q. Nie, L. Luo, C. Yao, Q. Gong, Y. Liu, X.-D. Zhou, J. J. A. a. m. Qiao and interfaces, *ACS Appl. Mater. Interfaces*, 2018, **11**, 578-587.
34. S. Ravichandran, N. Bhuvanendran, Q. Xu, T. Maiyalagan, L. Xing and H. Su, *J. Colloid Interface Sci.*, 2022, **608**, 207-218.
35. T. He, Y. Peng, Q. Jia, J. E. Lu, Q. Liu, R. Mercado, Y. Chen, F. Nichols, Y. Zhang and S. Chen, *ACS Appl. Mater. Interfaces*, 2019, **11**, 46912-46919.
36. G.-Q. Han, Y.-R. Liu, W.-H. Hu, B. Dong, X. Li, X. Shang, Y.-M. Chai, Y.-Q. Liu and C.-G. Liu, *J. Electrochem. Soc.*, 2016, **163**, H67-H73.
37. K. Xie, J. Masa, E. Madej, F. Yang, P. Weide, W. Dong, M. Muhler, W. Schuhmann and W. Xia, *ChemCatChem*, 2015, **7**, 3027-3035.
38. N. Li, W.-Y. Xia, J. Wang, Z.-L. Liu, Q.-Y. Li, S.-Z. Chen, C.-W. Xu and X.-H. Lu, *J. Mater. Chem. A*, 2015, **3**, 21308-21313.
39. Y. Zhao, C. Chang, F. Teng, Y. Zhao, G. Chen, R. Shi, G. I. Waterhouse, W. Huang and T. Zhang, *Adv. Energy Mater.*, 2017, **7**, 1700005.
40. D. Ji, L. Fan, L. Li, N. Mao, X. Qin, S. Peng and S. Ramakrishna, *Carbon*, 2019, **142**, 379-387.
41. W. Wan, X. Liu, H. Li, X. Peng, D. Xi and J. Luo, *Appl. Catal. B-Environ.*, 2019, **240**, 193-200.
42. Z. Zhang, X. Liang, J. Li, J. Qian, Y. Liu, S. Yang, Y. Wang, D. Gao and D. Xue, *ACS Appl. Mater. Interfaces*, 2020, **12**, 21661-21669.
43. J. S. Kim, I. Park, E. S. Jeong, K. Jin, W. M. Seong, G. Yoon, H. Kim, B. Kim, K. T. Nam and K. Kang, *Adv. Mater.*, 2017, **29**, 1606893.
44. Q. Sun, M. Zhou, Y. Shen, L. Wang, Y. Ma, Y. Li, X. Bo, Z. Wang and C. Zhao, *J. Catal.*, 2019, **373**, 180-189.
45. J. Wang, R. Kong, A. M. Asiri and X. Sun, *ChemElectroChem*, 2017, **4**, 481-484.
46. Z. Feng, H. Zhang, B. Gao, P. Lu, D. Li and P. Xing, *Int. J. Hydrog. Energy*, 2020, **45**, 19335-19343.
47. Q. Yang, Y. Cui, Q. Li, J. Cai, D. Wang and L. Feng, *ACS Sustain. Chem. Eng.*, 2020, **8**, 12089-12099.
48. Y. Chen, Z. Cai, D. Wang, Y. Yan, P. Wang and X. Wang, *Chem.-Asian J.*, 2021, **16**, 3107-3113.

49. P. Xu, L. Qiu, L. Wei, Y. Liu, D. Yuan, Y. Wang and P. Tsiakaras, *Catal. Today*, 2020, **355**, 815-821.
